# Supplementary material for: Naturally inspired polyelectrolyte multilayer composite films synthesised through layer-by-layer assembly and chemically infiltrated with CaCO3
Source: Royal Society of Chemistry journal article supplement (doi:10.1039/c5tb00055f), 2015-01-01
Supplement: c5tb00055f1.pdf [file c5tb00055f1.pdf]

### Supplementary Information

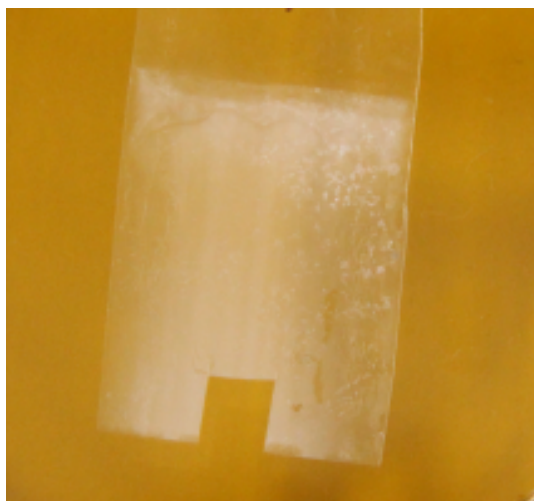

**Figure S1.** Digital image displaying a mineralised (PSS-PAH-CaCO<sub>3</sub>) film after infiltration of 40 cycles, the surface of the substrate appears to be translucent upon film deposition.
